# Supplementary material for: Intratumoral T Cells, Recurrence, and Survival in Epithelial Ovarian Cancer
Source: Atypon-hosted journal article supplement (doi:10.1056/nejmoa020177), 2003-01-15
Supplement: nejm_zhang_203sa1-4.pdf [file nejm_zhang_203sa1-4.pdf]

# Supplementary Appendix

This appendix has been provided by the authors to give readers additional information about their work.

Supplement to: Zhang L, Conejo-Garcia JR, Katsaros D, et al. Intratumoral T Cells, Recurrence, and Survival in Epithelial Ovarian Cancer. *N Engl J Med* 2003;348:203-13.

**Supplementary Appendix 1. Antibodies Used for Immunostaining.**

| Antibody              | Target                                             | Animal Source | Manufacturer             | Clone    |
|-----------------------|----------------------------------------------------|---------------|--------------------------|----------|
| Anti-CD3              | T cells                                            | Mouse         | BD Pharmingen            | SK-7     |
| Anti-CD3              | T cells                                            | Rabbit        | Dako                     |          |
| Anti-CD4              | T-cell subgroup                                    | Mouse         | BD Pharmingen            | SK-4     |
| Anti-CD8              | T-cell subgroup                                    | Mouse         | BD Pharmingen            | SK-1     |
| Anti-CD19             | B cells                                            | Mouse         | BD Pharmingen            | H1B19    |
| Anti-CD57             | Natural killer cells                               | Mouse         | BD Pharmingen            | NK-1     |
| Anti-CD11c            | Monocytes                                          | Mouse         | BD Pharmingen            | S-HCL-3  |
| Anti-CD45             | All leukocytes                                     | Mouse         | Novocastra               | X16/99   |
| Anti-CD45RO           | Memory cells                                       | Mouse         | BD Pharmingen            | UCHL-1   |
| Anti-CD83             | Mature antigen-presenting cells                    | Mouse         | BD Pharmingen            | HB15a    |
| Anti-MIG              | Monokine induced by interferon- $\gamma$           | Mouse         | BD Pharmingen            | B8-11    |
| Anti-SLC              | Secondary lymphoid-tissue chemokine                | Rabbit        | United States Biological |          |
| Anti-MDC              | Macrophage-derived chemokine                       | Goat          | Santa Cruz Biotechnology |          |
| Anti-VEGF             | Vascular endothelial growth factor                 | Mouse         | BD Pharmingen            | G153-694 |
| Anti-Ki-67            | Proliferating cells, activated T cells,<br>or both | Rabbit        | Dako                     |          |
| Anti-cytokeratin      | Tumor cells and epithelial cells                   | Rabbit        | Dako                     |          |
| Anti-cytokeratin-8/18 | Tumor cells and epithelial cells                   | Mouse         | Novocastra               | 5D3      |

**Supplementary Appendix 2. Tests Performed on Tumor Specimens.\***

| Test                           | Total No. of Tumor Specimens | No. of Specimens with Intratumoral T Cells | No. of Specimens without Intratumoral T Cells |
|--------------------------------|------------------------------|--------------------------------------------|-----------------------------------------------|
| Immunohistochemical analysis   |                              |                                            |                                               |
| CD3                            | 174                          | 102                                        | 72                                            |
| CD4                            | 30                           | 15                                         | 15                                            |
| CD8                            | 30                           | 15                                         | 15                                            |
| CD83                           | 30                           | 15                                         | 15                                            |
| CD57                           | 30                           | 15                                         | 15                                            |
| CD19                           | 30                           | 15                                         | 15                                            |
| CD11c                          | 30                           | 15                                         | 15                                            |
| CD45                           | 30                           | 15                                         | 15                                            |
| CD3 and CD45RO                 | 33                           | 18                                         | 15                                            |
| MIG                            | 80                           | 40                                         | 40                                            |
| SLC                            | 80                           | 40                                         | 40                                            |
| MDC                            | 80                           | 40                                         | 40                                            |
| VEGF                           | 80                           | 40                                         | 40                                            |
| Double immunofluorescence      |                              |                                            |                                               |
| CD3–CD83                       | 33                           | 18                                         | 15                                            |
| CD3–Ki-67                      | 33                           | 18                                         | 15                                            |
| CD3–CD45RO                     | 33                           | 18                                         | 15                                            |
| Real-time PCR                  |                              |                                            |                                               |
| CD3 $\epsilon$                 | 26                           | 16                                         | 10                                            |
| Interferon- $\gamma$           | 26                           | 16                                         | 10                                            |
| Interleukin-2                  | 26                           | 16                                         | 10                                            |
| Tumor necrosis factor $\alpha$ | 26                           | 16                                         | 10                                            |
| MIG                            | 26                           | 16                                         | 10                                            |
| SLC                            | 26                           | 16                                         | 10                                            |
| MDC                            | 26                           | 16                                         | 10                                            |
| VEGF                           | 26                           | 16                                         | 10                                            |
| MCP-1                          | 26                           | 16                                         | 10                                            |
| I-309                          | 26                           | 16                                         | 10                                            |
| SDF-1                          | 26                           | 16                                         | 10                                            |
| VCAM-1                         | 26                           | 16                                         | 10                                            |
| ICAM-1                         | 26                           | 16                                         | 10                                            |

\* MIG denotes monokine induced by interferon- $\gamma$ , SLC secondary lymphoid-tissue chemokine, MDC macrophage-derived chemokine, VEGF vascular endothelial growth factor, PCR polymerase chain reaction, MCP-1 monocyte chemoattractant protein 1, SDF-1 stroma-derived factor 1, VCAM-1 vascular-cell adhesion molecule 1, and ICAM-1 intercellular adhesion molecule 1.

**Supplementary Appendix 3. Amplification Primers Used for Real-Time Quantitative Polymerase Chain Reaction.**

| Gene                                           | Primer                                                            |
|------------------------------------------------|-------------------------------------------------------------------|
| Monokine induced by interferon- $\gamma$       | GAC CTT AAA CAA TTT GCC CCA AG<br>CAC ATC TGC TGA ATC TGG GTT TA  |
| Macrophage-derived chemokine                   | TGC CGT GAT TAC GTC CGT TA<br>TCT GAG GTC CAG TAG AAG TGT TTC A   |
| Secondary lymphoid-tissue chemokine (exodus-2) | CCT CAA GTA CAG CCA AAG GAA GA<br>TGC ACA TAG CTC TGC CTG AGA     |
| I-309                                          | CAG ACC AGA AGA CAT GCA GAT CA<br>CCG CAA ATG AGA AGC AAC ATC     |
| Stroma-derived factor 1                        | AAT TCT CAA CAC TCC AAA CTG TGC<br>TGC ACA CTT GTC TGT TGT TGT TC |
| Monocyte chemoattractant protein 1             | GCT CAT AGC AGC CAC CTT CAT T<br>TGG TGA AGT TAT AGC AGC AGG TG   |
| Interleukin-2                                  | AAC TCA CCA GGA TGC TCA CAT TT<br>TTA GCA CTT CCT CCA GAG GTT TG  |
| Interferon- $\gamma$                           | TTG GCT CTG CAT TAT TTT TCT GTC<br>CTG CCA GGA CCC ATA TGT AAA AG |
| Tumor necrosis factor $\alpha$                 | CCA GGC AGT CAG ATC ATC TTC TC<br>AGC TGG TTA TCT CTC AGC TCC AC  |
| Vascular endothelial growth factor             | AAC CAT GAA CTT TCT GCT GTC TTG<br>TTC ACC ACT TCG TGA TGA TTC TG |
| Vascular-cell adhesion molecule 1              | CTT AAA ATG CCT GGG AAG ATG GT<br>GTC AAT GAG ACG GAG TCA CCA AT  |
| Intercellular adhesion molecule 1              | ACG CTG AGC TCC TCT GCT ACT C<br>GGG CAG GAT GAC TTT TGA GG       |
| CD3 $\epsilon$                                 | GTC CCA TGA AAC AAA GAT GCA GT<br>CCA CCC ATT TCT TCA TTA CCA TC  |
| Glyceraldehyde-3-phosphate dehydrogenase       | CCT GCA CCA CCA ACT GCT TA<br>CAT GAG TCC TTC CAC GAT ACC A       |

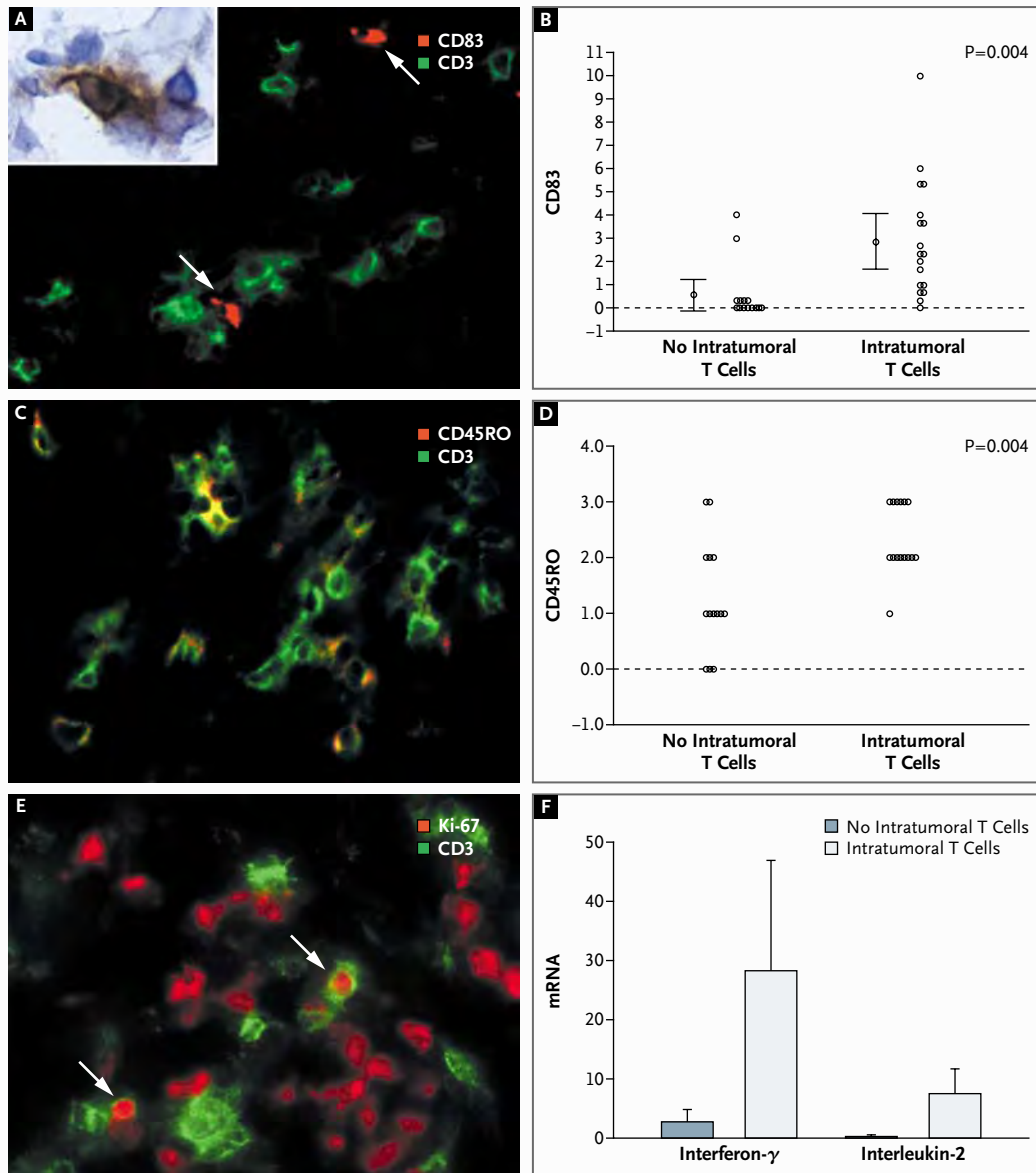

#### Supplementary Appendix 4. Activation of Immune Mechanisms in Association with Intratumoral T Cells.

In Panel A, double immunofluorescence with a monoclonal antibody against CD83 (Texas red; red, arrows) and with a polyclonal antibody against CD3 (fluorescein; green) demonstrates clustering of T cells around a CD83+ antigen-presenting cell. The inset shows immunohistochemical detection of a CD83+ cell with morphologic features of a dendritic cell, surrounded by small mononuclear cells with scant cytoplasm, identifying them as lymphocytes. Panel B shows quantification by image analysis of CD83+ cells detected by immunohistochemical analysis in tumors with T cells and those without T cells. There is a significantly higher number of CD83+ cells in tumors harboring T cells than in tumors without T cells. In Panel C, double immunofluorescence with a monoclonal antibody against CD45RO (Texas red; red) and a polyclonal antibody against CD3 (fluorescein; green) shows memory CD45RO+CD3+ T cells in a tumor containing T cells. Double-positive cells appear yellow due to colocalization of both CD45RO and CD3 on the cell surface. Panel D shows quantification by image analysis of CD45RO+ (memory) T cells detected by immunohistochemical analysis in the stroma of tumors with or without T cells. There are significantly more memory T cells in the stroma of tumors containing T cells than in the stroma of tumors without T cells. In Panel E, double immunofluorescence with a monoclonal antibody against CD3 (fluorescein; green) and a polyclonal antibody against Ki-67 (Texas red; red) reveals activated Ki-67+CD3+ T cells in a tumor containing T cells. Panel F shows the results of real-time quantitative PCR analysis of the levels of interleukin-2 and interferon- $\gamma$  messenger RNA (mRNA) in 16 ovarian carcinomas harboring intratumoral T cells and 10 ovarian carcinomas without intratumoral T cells. Higher levels of interleukin-2 mRNA ( $P=0.09$ ) and interferon- $\gamma$  mRNA ( $P=0.02$ ) were found in tumors containing T cells than in tumors without T cells. The presence of both cytokines indicates antigen-dependent T-cell activation and type 1 polarization. The y axis represents the relative expression of interferon- $\gamma$  and interleukin-2 in relation to glyceraldehyde-3-phosphate dehydrogenase.
